# Supplementary material
Source: PubMed Central journal article supplement (PMC6587152)
Supplement: jamaophthalmol-137-921-s001.pdf [file jamaophthalmol-137-921-s001.pdf]

## Supplementary Online Content

Berkowitz ST, Sternberg P Jr, Feng X, Chen Q, Patel S. Analysis of anti-vascular endothelial growth factor injection claims data in US Medicare Part B beneficiaries from 2012 to 2015. *JAMA Ophthalmol*. Published online June 20, 2019. doi:10.1001/jamaophthalmol.2019.1971

**eTable 1.** Trend in Anti-VEGF Injections Administered in Medicare Part B Population (2012-2015)

**eTable 2.** Geographic Disparities in Anti-VEGF Injections by State

This supplementary material has been provided by the authors to give readers additional information about their work.

**eTable 1. Trend in Anti-VEGF Injections Administered in Medicare Part B Population (2012-2015)**

|                                                                           | aflibercept |                    |                    |                    | ranibizumab        |                    |                    |                    | bevacizumab        |                   |                  |                    |
|---------------------------------------------------------------------------|-------------|--------------------|--------------------|--------------------|--------------------|--------------------|--------------------|--------------------|--------------------|-------------------|------------------|--------------------|
|                                                                           | 2012        | 2013               | 2014               | 2015               | 2012               | 2013               | 2014               | 2015               | 2012               | 2013              | 2014             | 2015               |
| Total No. of Injections                                                   | NA          | 514 225            | 621 843            | 870 843            | 751 122            | 820 250            | 811 436            | 697 412            | 1 384 981          | 1 178 263         | 1 202 329        | 1 147 432          |
| No. of Injections administered by top 100 injectors (% of national total) | NA          | 114 990<br>(22.4%) | 122 709<br>(19.7%) | 153 467<br>(17.6%) | 239 321<br>(31.9%) | 250 356<br>(30.5%) | 237 418<br>(29.3%) | 216 142<br>(31.0%) | 235 095<br>(17.0%) | 219 820<br>(18.7) | 227 811<br>(19%) | 225 083<br>(19.6%) |

**eTable 2. Geographic Disparities in Anti-VEGF Injections by State**

Average No. of Injections per 1000 Medicare Part B Beneficiaries in 2015

| all intravitreal injections |       | aflibercept          |      | ranibizumab          |      | bevacizumab          |      |
|-----------------------------|-------|----------------------|------|----------------------|------|----------------------|------|
| <b>Florida</b>              | 102.1 | Nebraska             | 48.6 | Tennessee            | 48.4 | South Dakota         | 51.9 |
| <b>Nebraska</b>             | 99.0  | Connecticut          | 41.2 | Kansas               | 47.2 | Indiana              | 51.2 |
| <b>Utah</b>                 | 97.6  | Utah                 | 38.6 | Pennsylvania         | 38.9 | Montana              | 49.5 |
| <b>South Dakota</b>         | 94.9  | Iowa                 | 37.7 | Utah                 | 36.8 | Idaho                | 49.3 |
| <b>Oregon</b>               | 92.0  | North Dakota         | 35.4 | Iowa                 | 34.9 | South Carolina       | 49.1 |
| <b>New Hampshire</b>        | 34.0  | Alaska               | 9.1  | District of Columbia | 2.4  | District of Columbia | 16.2 |
| <b>District of Columbia</b> | 24.3  | Vermont              | 7.7  | New Hampshire        | 2.1  | Alaska               | 12.6 |
| <b>Alaska</b>               | 23.1  | South Carolina       | 6.8  | Alaska               | 1.0  | Maine                | 10.7 |
| <b>Vermont</b>              | 14.7  | District of Columbia | 3.2  | Vermont              | <1   | Wyoming              | 8.3  |
| <b>Wyoming</b>              | 10.6  | Wyoming              | 2.7  | Wyoming              | <1   | Vermont              | 6.1  |
